# Supplementary material for: The extent of carbapenemase-encoding genes in public genome sequences
Source: PeerJ journal article supplement (doi:10.7717/peerj.11000), 2021-03-09
Supplement: Supplemental_File_1.docx [file Supplemental_File_1.docx]

| **Environment** | **Keywords** |
| --- | --- |
| Soil | soil, sand, sediment, mud, clay, slurry, rock |
| wastewater | wastewater, sludge, sewage |
| water | water, waterway, pond, marine, lake, ocean, aquatic, sea, canal, waterfall, hot spring, river, creek, drainage, spring, seawater, hydrothermal vent |
| food | dish, ricotta, cheonggukjang, kebap, starch, cereals, citrus, wheat, actinidia, cucumis sativus, zea mays, chicken breast, mussel, sugarcane, clam, bean, brewery, beef, ground turkey, banana, food, milk , oyster, cheese, dairy, wine, ground beef, kiwi, fruit, pork chop, tomato, kefir, meat, chicken wing, kimchi, beer, peanut butter, white peach, seafood, vegetable, cake, pepper, lettuce, yogurt, mashed potatoes, potato, mayonnaise, noodles, raspberries, apple, paprika, spinach, salad, pie, salami, sauce, pear, meal, champagne, pasta, honey, curry, flour, soup, doenjang, kaanga wai, tea |
| plant | wood, plant |

| **Group** | **Keywords** |
| --- | --- |
| clinical | outbreak, patient, hospital, disease, infect, urine, bone, lymph, blood, wound, clinical, treatment, sputum, urinary, epidermis, liver, fever, plasma, inflamed, bronchi, abscess, pus, CSF, cerebrospinal, spleen, lung, kidney, urethra, respiratory |
| not-clinical | rectal, diarrhea, fecal, stool, skin, faecal, feces |
