# Supplementary material for: The extent of carbapenemase-encoding genes in public genome sequences
Source: PeerJ journal article supplement (doi:10.7717/peerj.11000), 2021-03-09
Supplement: Supplemental_File_4.docx [file Supplemental_File_4.docx]

|  | **Bacterial species** |
| --- | --- |
| 1 | *Achromobacter denitrificans* |
| 2 | *Achromobacter sp.* |
| 3 | *Acinetobacter baumannii* |
| 4 | *Acinetobacter bereziniae* |
| 5 | *Acinetobacter calcoaceticus* |
| 6 | *Acinetobacter calcoaceticus/baumannii* |
| 7 | *Acinetobacter dijkshoorniae* |
| 8 | *Acinetobacter gandensis* |
| 9 | *Acinetobacter genomosp.* |
| 10 | *Acinetobacter guillouiae* |
| 11 | *Acinetobacter haemolyticus* |
| 12 | *Acinetobacter indicus* |
| 13 | *Acinetobacter johnsonii* |
| 14 | *Acinetobacter junii* |
| 15 | *Acinetobacter lwoffii* |
| 16 | *Acinetobacter nosocomialis* |
| 17 | *Acinetobacter pittii* |
| 18 | *Acinetobacter radioresistens* |
| 19 | *Acinetobacter schindleri* |
| 20 | *Acinetobacter soli* |
| 21 | *Acinetobacter sp.* |
| 22 | *Aeromonas caviae* |
| 23 | *Aeromonas hydrophila* |
| 24 | *Aeromonas sp.* |
| 25 | *Alcaligenes faecalis* |
| 26 | *Bacillus cereus* |
| 27 | *Bacillus subtilis* |
| 28 | *Bacillus thuringiensis* |
| 29 | *Chryseobacterium gleum* |
| 30 | *Chryseobacterium indologenes* |
| 31 | *Citrobacter braakii* |
| 32 | *Citrobacter farmeri* |
| 33 | *Citrobacter freundii* |
| 34 | *Citrobacter koseri* |
| 35 | *Citrobacter sp.* |
| 36 | *Citrobacter werkmanii* |
| 37 | *Elizabethkingia miricola* |
| 38 | *Elizabethkingia sp.* |
| 39 | *Enterobacter aerogenes* |
| 40 | *Enterobacter asburiae* |
| 41 | *Enterobacter cloacae* |
| 42 | *Enterobacter hormaechei* |
| 43 | *Enterobacter kobei* |
| 44 | *Enterobacter ludwigii* |
| 45 | *Enterobacter mori* |
| 46 | *Enterobacter sp.* |
| 47 | *Enterobacter xiangfangensis* |
| 48 | *Erythrobacter sp.* |
| 49 | *Escherichia coli* |
| 50 | *Escherichia sp.* |
| 51 | *Gallaecimonas pentaromativorans* |
| 52 | *Klebsiella aerogenes* |
| 53 | *Klebsiella grimontii* |
| 54 | *Klebsiella michiganensis* |
| 55 | *Klebsiella oxytoca* |
| 56 | *Klebsiella pneumoniae* |
| 57 | *Klebsiella quasipneumoniae* |
| 58 | *Klebsiella sp.* |
| 59 | *Klebsiella variicola* |
| 60 | *Kluyvera ascorbata* |
| 61 | *Kluyvera intermedia* |
| 62 | *Leclercia adecarboxylata* |
| 63 | *Leclercia sp.* |
| 64 | *Morganella morganii* |
| 65 | *Mycobacterium tuberculosis* |
| 66 | *Pandoraea pnomenusa* |
| 67 | *Pantoea sp.* |
| 68 | *Pluralibacter gergoviae* |
| 69 | *Proteus mirabilis* |
| 70 | *Providencia rettgeri* |
| 71 | *Providencia sp.* |
| 72 | *Providencia stuartii* |
| 73 | *Pseudomonas aeruginosa* |
| 74 | *Pseudomonas guariconensis* |
| 75 | *Pseudomonas plecoglossicida* |
| 76 | *Pseudomonas putida* |
| 77 | *Pseudomonas sp.* |
| 78 | *Pseudomonas stutzeri* |
| 79 | *Ralstonia mannitolilytica* |
| 80 | *Ralstonia pickettii* |
| 81 | *Ralstonia sp.* |
| 82 | *Raoultella ornithinolytica* |
| 83 | *Raoultella planticola* |
| 84 | *Salmonella enterica* |
| 85 | *Serratia marcescens* |
| 86 | *Serratia sp.* |
| 87 | *Shewanella bicestrii* |
| 88 | *Shewanella putrefaciens* |
| 89 | *Shewanella sp.* |
| 90 | *Shigella sonnei* |
| 91 | *Staphylococcus aureus* |
| 92 | *Staphylococcus epidermidis* |
| 93 | *Streptomyces sp.* |
| 94 | *Vibrio cholerae* |
| 95 | *Vibrio parahaemolyticus* |
