# Supplementary material for: The extent of carbapenemase-encoding genes in public genome sequences
Source: PeerJ journal article supplement (doi:10.7717/peerj.11000), 2021-03-09
Supplement: Supplemental_File_6.docx [file Supplemental_File_6.docx]

**Human (175 genes)**

BlaB-9, CGB-1, DIM-1, GES-2, GES-20, GES-24, GES-5, GES-6, GIM-1, IMI-1, IMI-2, IMI-4, IMI-7, IMI-9, IMP-1, IMP-10, IMP-13, IMP-14, IMP-18, IMP-19, IMP-26, IMP-27, IMP-34, IMP-4, IMP-45, IMP-6, IMP-7, IMP-8, KPC-12, KPC-18, KPC-2, KPC-3, KPC-31, KPC-32, KPC-33, KPC-4, KPC-5, KPC-6, KPC-7, KPC-8, NDM-1, NDM-21, NDM-4, NDM-5, NDM-6, NDM-7, NDM-9, NmcA, OXA-100, OXA-104, OXA-106, OXA-107, OXA-109, OXA-111, OXA-113, OXA-117, OXA-120, OXA-121, OXA-123, OXA-126, OXA-128, OXA-132, OXA-134, OXA-143, OXA-144, OXA-151, OXA-162, OXA-164, OXA-172, OXA-180, OXA-181, OXA-204, OXA-207, OXA-208, OXA-214, OXA-217, OXA-219, OXA-223, OXA-225, OXA-23, OXA-231, OXA-232, OXA-234, OXA-235, OXA-237, OXA-239, OXA-24, OXA-241, OXA-242, OXA-244, OXA-245, OXA-259, OXA-260, OXA-261, OXA-262, OXA-263, OXA-264, OXA-265, OXA-268, OXA-270, OXA-271, OXA-272, OXA-273, OXA-276, OXA-277, OXA-281, OXA-282, OXA-283, OXA-284, OXA-285, OXA-300, OXA-301, OXA-304, OXA-305, OXA-312, OXA-314, OXA-317, OXA-337, OXA-338, OXA-340, OXA-360, OXA-374, OXA-378, OXA-383, OXA-402, OXA-407, OXA-417, OXA-421, OXA-424, OXA-425, OXA-426, OXA-431, OXA-441, OXA-444, OXA-48, OXA-499, OXA-500, OXA-501, OXA-502, OXA-503, OXA-506, OXA-51, OXA-533, OXA-535, OXA-58, OXA-64, OXA-65, OXA-66, OXA-68, OXA-69, OXA-70, OXA-71, OXA-72, OXA-75, OXA-78, OXA-80, OXA-82, OXA-83, OXA-88, OXA-90, OXA-91, OXA-92, OXA-94, OXA-95, OXA-96, OXA-98, OXA-99, SME-2, SME-4, SPM-1, VIM-1, VIM-2, VIM-24, VIM-36, VIM-4, VIM-5

**Miscellaneous (109 genes)**

BcII-1, GES-5, GIM-1, IMI-12, IMP-1, IMP-13, IMP-14, IMP-18, IMP-19, IMP-34, IMP-4, IMP-8, IMP-9, KPC-2, KPC-3, KPC-4, KPC-6, NDM-1, NDM-19, NDM-5, NDM-6, NDM-7, NDM-9, NmcA, OXA-100, OXA-103, OXA-104, OXA-106, OXA-109, OXA-113, OXA-120, OXA-121, OXA-126, OXA-144, OXA-172, OXA-181, OXA-202, OXA-208, OXA-211, OXA-212, OXA-213, OXA-214, OXA-217, OXA-223, OXA-23, OXA-232, OXA-235, OXA-24, OXA-242, OXA-244, OXA-245, OXA-254, OXA-259, OXA-263, OXA-264, OXA-267, OXA-272, OXA-276, OXA-277, OXA-281, OXA-282, OXA-283, OXA-301, OXA-314, OXA-334, OXA-338, OXA-340, OXA-343, OXA-344, OXA-360, OXA-374, OXA-378, OXA-381, OXA-402, OXA-407, OXA-421, OXA-431, OXA-48, OXA-500, OXA-506, OXA-51, OXA-510, OXA-545, OXA-58, OXA-60, OXA-64, OXA-65, OXA-66, OXA-67, OXA-68, OXA-69, OXA-70, OXA-71, OXA-72, OXA-78, OXA-82, OXA-83, OXA-90, OXA-91, OXA-92, OXA-94, OXA-98, SME-4, SPM-1, VIM-1, VIM-2, VIM-33, VIM-48, VIM-7
