# Supplementary material for: The extent of carbapenemase-encoding genes in public genome sequences
Source: PeerJ journal article supplement (doi:10.7717/peerj.11000), 2021-03-09
Supplement: Supplemental_File_7.docx [file Supplemental_File_7.docx]

|  |  |  |  |
| --- | --- | --- | --- |
| **human** | | **miscellaneous** | |
| 1 | *Achromobacter sp.* | 1 | *Achromobacter denitrificans* |
| 2 | *Acinetobacter baumannii* | 2 | *Acinetobacter baumannii* |
| 3 | *Acinetobacter bereziniae* | 3 | *Acinetobacter bereziniae* |
| 4 | *Acinetobacter calcoaceticus* | 4 | *Acinetobacter calcoaceticus* |
| 5 | *Acinetobacter calcoaceticus/baumannii* | 5 | *Acinetobacter genomosp.* |
| 6 | *Acinetobacter dijkshoorniae* | 6 | *Acinetobacter guillouiae* |
| 7 | *Acinetobacter genomosp.* | 7 | *Acinetobacter haemolyticus* |
| 8 | *Acinetobacter haemolyticus* | 8 | *Acinetobacter johnsonii* |
| 9 | *Acinetobacter johnsonii* | 9 | *Acinetobacter junii* |
| 10 | *Acinetobacter lwoffii* | 10 | *Acinetobacter lwoffii* |
| 11 | *Acinetobacter nosocomialis* | 11 | *Acinetobacter nosocomialis* |
| 12 | *Acinetobacter pittii* | 12 | *Acinetobacter pittii* |
| 13 | *Acinetobacter radioresistens* | 13 | *Acinetobacter radioresistens* |
| 14 | *Acinetobacter schindleri* | 14 | *Acinetobacter schindleri* |
| 15 | *Acinetobacter soli* | 15 | *Acinetobacter sp.* |
| 16 | *Acinetobacter sp.* | 16 | *Bacillus cereus* |
| 17 | *Aeromonas caviae* | 17 | *Bacillus thuringiensis* |
| 18 | *Aeromonas hydrophila* | 18 | *Citrobacter freundii* |
| 19 | *Aeromonas sp.* | 19 | *Citrobacter sp.* |
| 20 | *Alcaligenes faecalis* | 20 | *Enterobacter aerogenes* |
| 21 | *Chryseobacterium gleum* | 21 | *Enterobacter asburiae* |
| 22 | *Citrobacter farmeri* | 22 | *Enterobacter cloacae* |
| 23 | *Citrobacter freundii* | 23 | *Enterobacter hormaechei* |
| 24 | *Citrobacter koseri* | 24 | *Enterobacter sp.* |
| 25 | *Citrobacter sp.* | 25 | *Escherichia coli* |
| 26 | *Citrobacter werkmanii* | 26 | *Klebsiella aerogenes* |
| 27 | *Elizabethkingia miricola* | 27 | *Klebsiella michiganensis* |
| 28 | *Elizabethkingia sp.* | 28 | *Klebsiella oxytoca* |
| 29 | *Enterobacter aerogenes* | 29 | *Klebsiella pneumoniae* |
| 30 | *Enterobacter asburiae* | 30 | *Klebsiella variicola* |
| 31 | *Enterobacter cloacae* | 31 | *Morganella morganii* |
| 32 | *Enterobacter hormaechei* | 32 | *Mycobacterium tuberculosis* |
| 33 | *Enterobacter kobei* | 33 | *Pantoea sp.* |
| 34 | *Enterobacter ludwigii* | 34 | *Proteus mirabilis* |
| 35 | *Enterobacter mori* | 35 | *Providencia rettgeri* |
| 36 | *Enterobacter sp.* | 36 | *Providencia stuartii* |
| 37 | *Enterobacter xiangfangensis* | 37 | *Pseudomonas aeruginosa* |
| 38 | *Escherichia coli* | 38 | *Pseudomonas putida* |
| 39 | *Escherichia sp.* | 39 | *Ralstonia pickettii* |
| 40 | *Klebsiella aerogenes* | 40 | *Ralstonia sp.* |
| 41 | *Klebsiella grimontii* | 41 | *Raoultella ornithinolytica* |
| 42 | *Klebsiella michiganensis* | 42 | *Raoultella planticola* |
| 43 | *Klebsiella oxytoca* | 43 | *Salmonella enterica* |
| 44 | *Klebsiella pneumoniae* | 44 | *Serratia marcescens* |
| 45 | *Klebsiella quasipneumoniae* | 45 | *Shewanella putrefaciens* |
| 46 | *Klebsiella sp.* | 46 | *Staphylococcus aureus* |
| 47 | *Klebsiella variicola* | 47 | *Streptomyces sp.* |
| 48 | *Kluyvera ascorbata* | 48 | *Vibrio cholerae* |
| 49 | *Kluyvera intermedia* |  |  |
| 50 | *Leclercia adecarboxylata* |  |  |
| 51 | *Leclercia sp.* |  |  |
| 52 | *Morganella morganii* |  |  |
| 53 | *Pandoraea pnomenusa* |  |  |
| 54 | *Pantoea sp.* |  |  |
| 55 | *Pluralibacter gergoviae* |  |  |
| 56 | *Proteus mirabilis* |  |  |
| 57 | *Providencia rettgeri* |  |  |
| 58 | *Providencia sp.* |  |  |
| 59 | *Providencia stuartii* |  |  |
| 60 | *Pseudomonas aeruginosa* |  |  |
| 61 | *Pseudomonas putida* |  |  |
| 62 | *Pseudomonas sp.* |  |  |
| 63 | *Pseudomonas stutzeri* |  |  |
| 64 | *Ralstonia mannitolilytica* |  |  |
| 65 | *Raoultella ornithinolytica* |  |  |
| 66 | *Raoultella planticola* |  |  |
| 67 | *Salmonella enterica* |  |  |
| 68 | *Serratia marcescens* |  |  |
| 69 | *Serratia sp.* |  |  |
| 70 | *Shewanella bicestrii* |  |  |
| 71 | *Shewanella sp.* |  |  |
| 72 | *Shigella sonnei* |  |  |
| 73 | *Staphylococcus epidermidis* |  |  |
